# Supplementary material for: Sis1 potentiates the stress response to protein aggregation and elevated temperature
Source: Springer Nature journal article supplement (doi:10.1038/s41467-020-20000-x), 2020-12-08
Supplement: MOESM1 [file 41467_2020_20000_MOESM1_ESM.pdf]

## Supplementary information

# **Sis1 potentiates the stress response to protein aggregation and elevated temperature**

Courtney L. Klaips<sup>1,2</sup>, Michael H. M. Gropp<sup>1</sup>, Mark S. Hipp<sup>2,3</sup> and

F. Ulrich Hartl<sup>1,\*</sup>

<sup>1</sup>Department of Cellular Biochemistry, Max Planck Institute of Biochemistry, Am Klopferspitz 18, 82152 Martinsried, Germany

<sup>2</sup>Department of Biomedical Sciences of Cells and Systems, University Medical Center Groningen, University of Groningen, Antonius Deusinglaan 1, 9713 AV Groningen, The Netherlands

<sup>3</sup>School of Medicine and Health Sciences, Carl von Ossietzky University Oldenburg, Oldenburg, Germany

\*Correspondence and requests for materials should be addressed to F.U.H. (email: [uhartl@biochem.mpg.de](mailto:uhartl@biochem.mpg.de))

Supplementary information includes 7 figures and 7 tables.

## Supplementary Figures

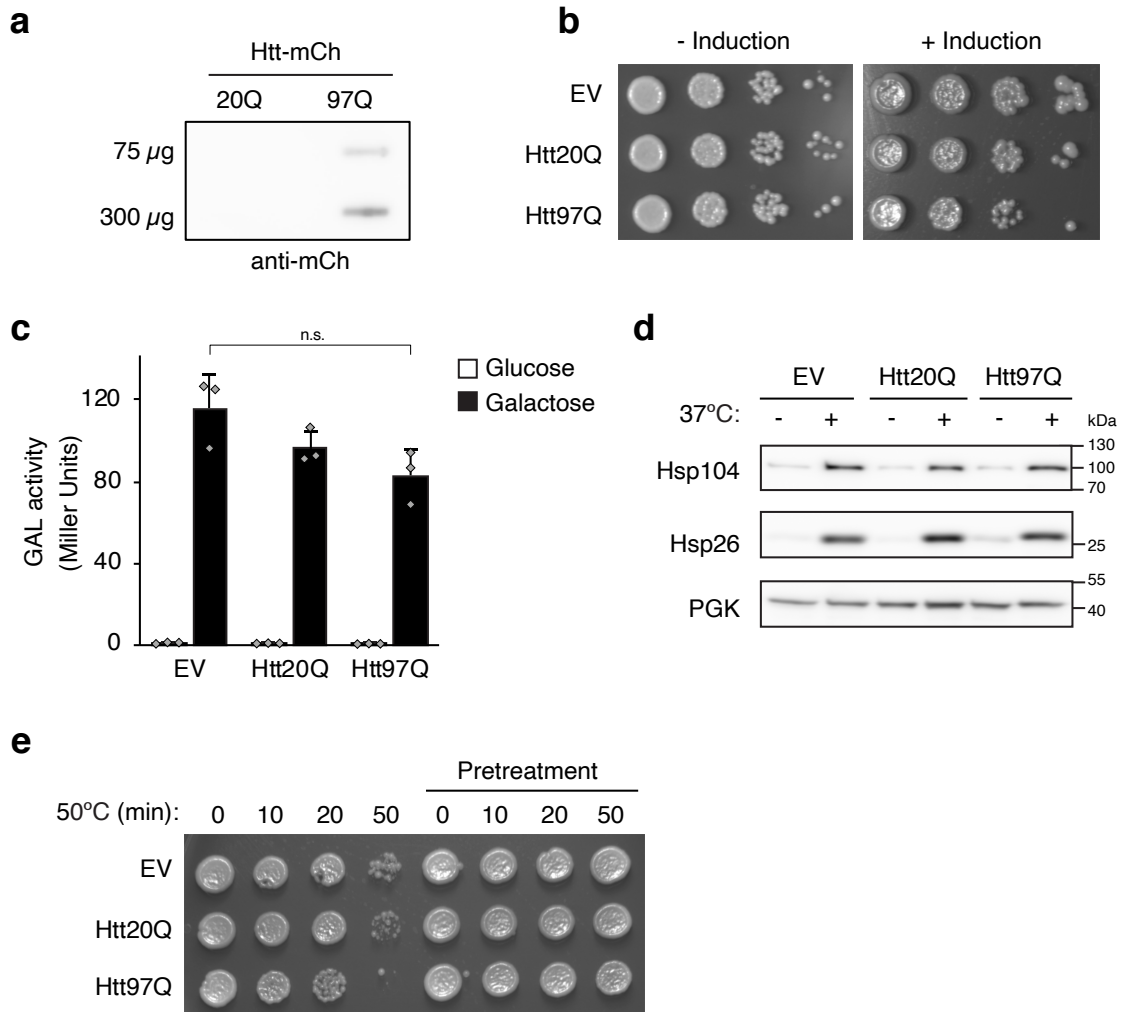

### Supplementary Fig. 1 | Aggregation of polyQ expansion protein does not trigger a stress response in yeast.

**a**, Htt97Q-mCh forms SDS resistant aggregates. Lysates from cells expressing Htt20Q-mCh or Htt97Q-mCh corresponding to 75 and 300 µg total protein were filtered through a 0.2 µm cellulose acetate membrane after treatment with 2% SDS. The membrane was then processed for immunodetection with anti-mCherry antibody. A representative result is shown from experiments performed in triplicate. **b**, Expression of Htt97Q in yeast is not overtly toxic. Yeast cells expressing Htt20Q or Htt97Q and empty vector (EV) control were serially diluted and plated on non-inducing (glucose) or inducing (galactose) media. **c**, Htt97Q aggregates have only a minor effect on β-galactosidase activity levels. β-Galactosidase activity was measured in cells expressing Htt20Q or Htt97Q and containing a LacZ reporter under the control of a galactose inducible promoter (GAL), grown in glucose or galactose containing media. Data represent mean + SD from 3 independent experiments. n.s.,  $p > 0.05$  by unpaired, two-sided t-test. **d**, The heat-induced cytosolic stress response remains active in polyQ expressing cells. Lysates from cells expressing Htt20Q, Htt97Q or empty vector (EV) control grown at 30°C and either maintained at 30°C or shifted to 37°C for 1 h were analyzed by SDS-PAGE and immunoblotting for Hsp104, Hsp26, or PGK. Representative results of 3 independent

experiments are shown. **e**, Mild heat treatment protects Htt97Q expressing cells against lethal heat exposure. Growth at 30°C was analyzed in cells expressing Htt20Q, Htt97Q or empty vector (EV) control either grown at 30°C before exposure to a lethal stress at 50°C (left) or first exposed to a mild heat stress for 1 h at 37°C, followed by 50°C heat stress (right).

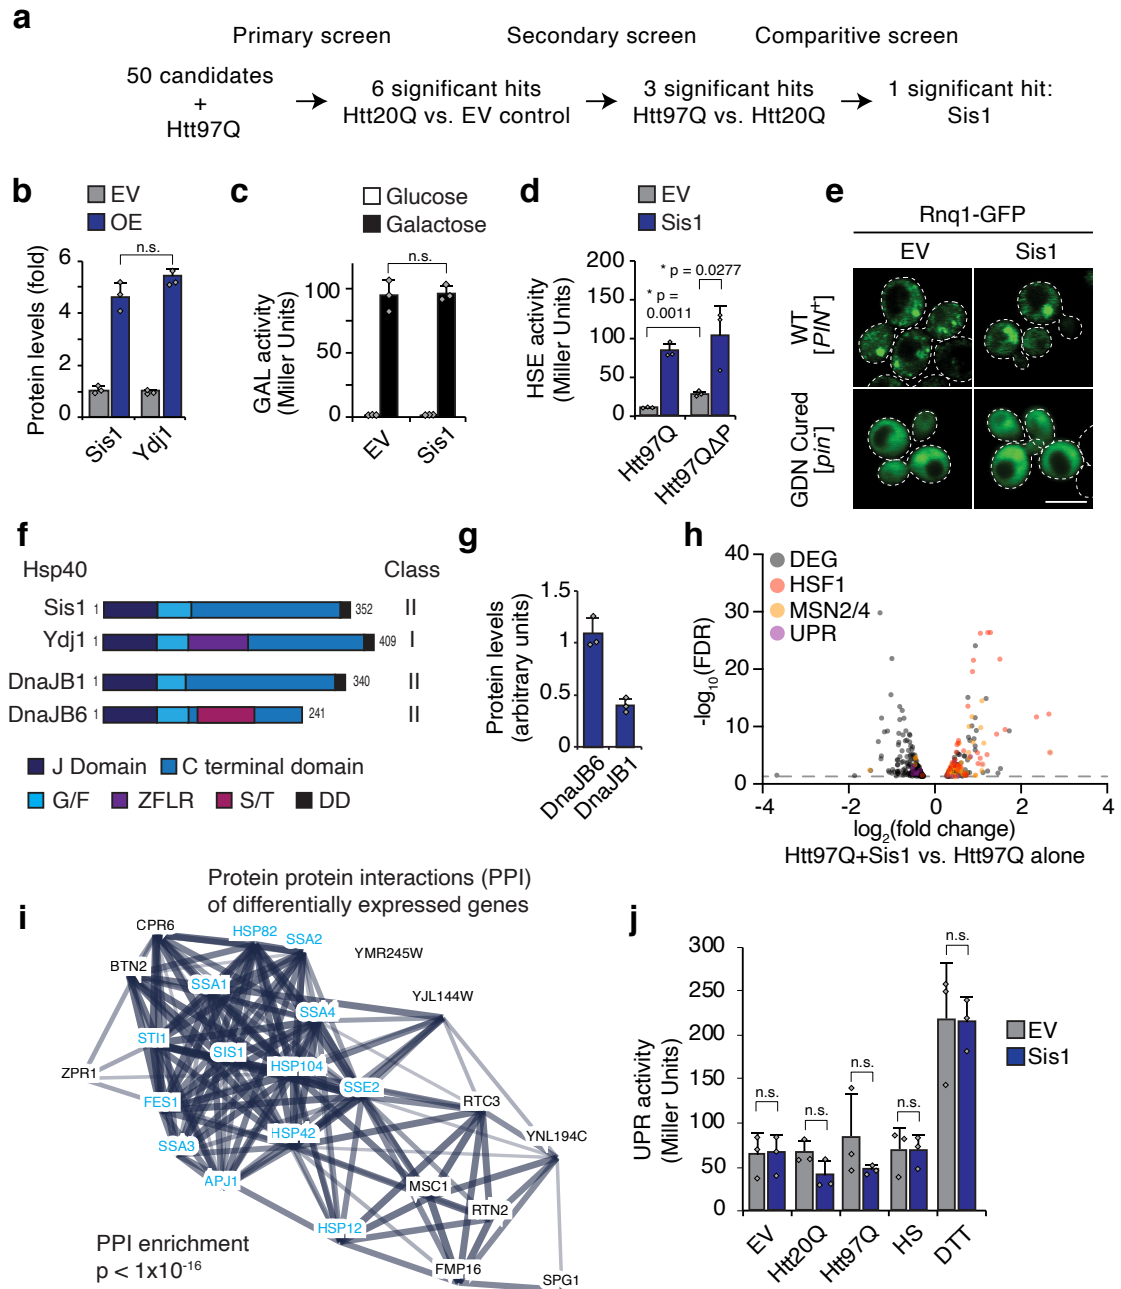

**Supplementary Fig. 2 | Sis1 enables stress response activation by polyQ expansion protein.** **a**, Schematic representation of chaperone screen strategy. In the primary screen, Htt97Q and each of 50 chaperones available in a  $2\mu$  library was expressed in cells containing  $P_{HSE}LacZ$ . The chaperones identified as enabling a HSR were next expressed with Htt20Q to select against those having general stress response effects. Finally, chaperones were identified that allowed HSR induction by Htt97Q that was significantly greater than induction by Htt20Q. See also Supplementary Table 1. **b**, Sis1 and Ydj1 overexpression levels. Lysates from cells expressing either an empty vector control, Sis1 or Ydj1 from a centromeric vector under the *GPD* promoter were analyzed by SDS-PAGE and immunoblotting for Sis1 or Ydj1 and PGK as a loading control, followed by densitometry. Data represent mean + SD from 3 independent experiments. n.s.,  $p > 0.05$  by unpaired, two-sided t-test. See also Supplementary Fig. 6a. **c**, A LacZ reporter containing a galactose-inducible promoter is not affected by

Sis1 overexpression.  $\beta$ -Galactosidase activity was measured in cells containing  $P_{GAL}LacZ$  with or without Sis1 overexpression after growth in glucose (repressive) or galactose (inducing). Data represent mean + SD from 3 independent experiments. n.s.,  $p > 0.05$  by unpaired, two-sided t-test. **d**, A toxic Htt exon-1 construct lacking the poly-proline region (Htt97Q $\Delta$ P) induces the stress response in a Sis1 dependent manner.  $\beta$ -Galactosidase activity was measured in cells expressing Htt97Q or Htt97Q $\Delta$ P with and without Sis1 overexpression. Data represent mean + SD from 3 independent experiments. \*,  $p$  values are reported for unpaired, two-sided t-tests. **e**, The PIN prion status of cells is not affected by Sis1 overexpression. Confocal imaging of cells expressing Rnq1-GFP with or without Sis1 overexpression. Scale bar = 5  $\mu$ m. Experiments were performed in triplicate, representative images shown. **f**, Domain topology of selected J-domain proteins. General domain topology for Sis1, Ydj1, DnaJB1 and DnaJB6 is shown. G/F, glycine, phenylalanine rich region; ZFLR, zinc-finger like region; S/T, serine, threonine rich region; DD, dimerization domain. **g**, DnaJB6 and DnaJB1 overexpression levels. Lysates from cells expressing V5-tagged DnaJB6 or DnaJB1 from a centromeric vector under the *GPD* promoter were analyzed by SDS-PAGE and immunoblotting for V5 and PGK as a loading control, followed by densitometry. Data represent mean + SD from 3 independent experiments. **h**, Volcano plot of genes that were significantly differentially expressed (DEG) between cells expressing Htt97Q alone vs. Htt97Q with Sis1 overexpression are shown on a volcano plot. Dashed line =  $p$  adjusted 0.05. Common stress operons are marked (HSF1, red; MSN2/4, orange; UPR, purple). Due to scale, the exogenously overexpressed Sis1 is not shown ( $\log_2$  fold change = 4.5406,  $-\log_{10}(\text{FDR}) = 97.7073$ ). See also Supplementary Table 3. **i**, Protein-protein interaction map for genes enriched upon Sis1 expression with Htt97Q, as determined by mRNA sequencing. Differentially expressed genes enriched more than two-fold upon co-overexpression of Sis1 with Htt97Q compared to expression of Htt97Q alone were analyzed for protein-protein interactions (PPI). Line thickness represents relative number of identified interactions in the String database (string-db.org). Chaperone proteins and co-factors are indicated in blue. **j**, A LacZ reporter containing an unfolded protein response (UPR) inducible promoter is not induced by Htt97Q or Sis1 expression.  $\beta$ -Galactosidase activity was measured in cells containing  $P_{UPR}LacZ$  and Htt20Q, Htt97Q or empty vector (EV) control with or without Sis1 overexpression at normal temperature of 30°C after exposure to heat stress at 37°C for 1 h (HS), or after treatment with DTT (2 mM). Data represent mean + SD from 3 independent experiments. n.s.,  $p > 0.05$  by unpaired, two-sided t-test.

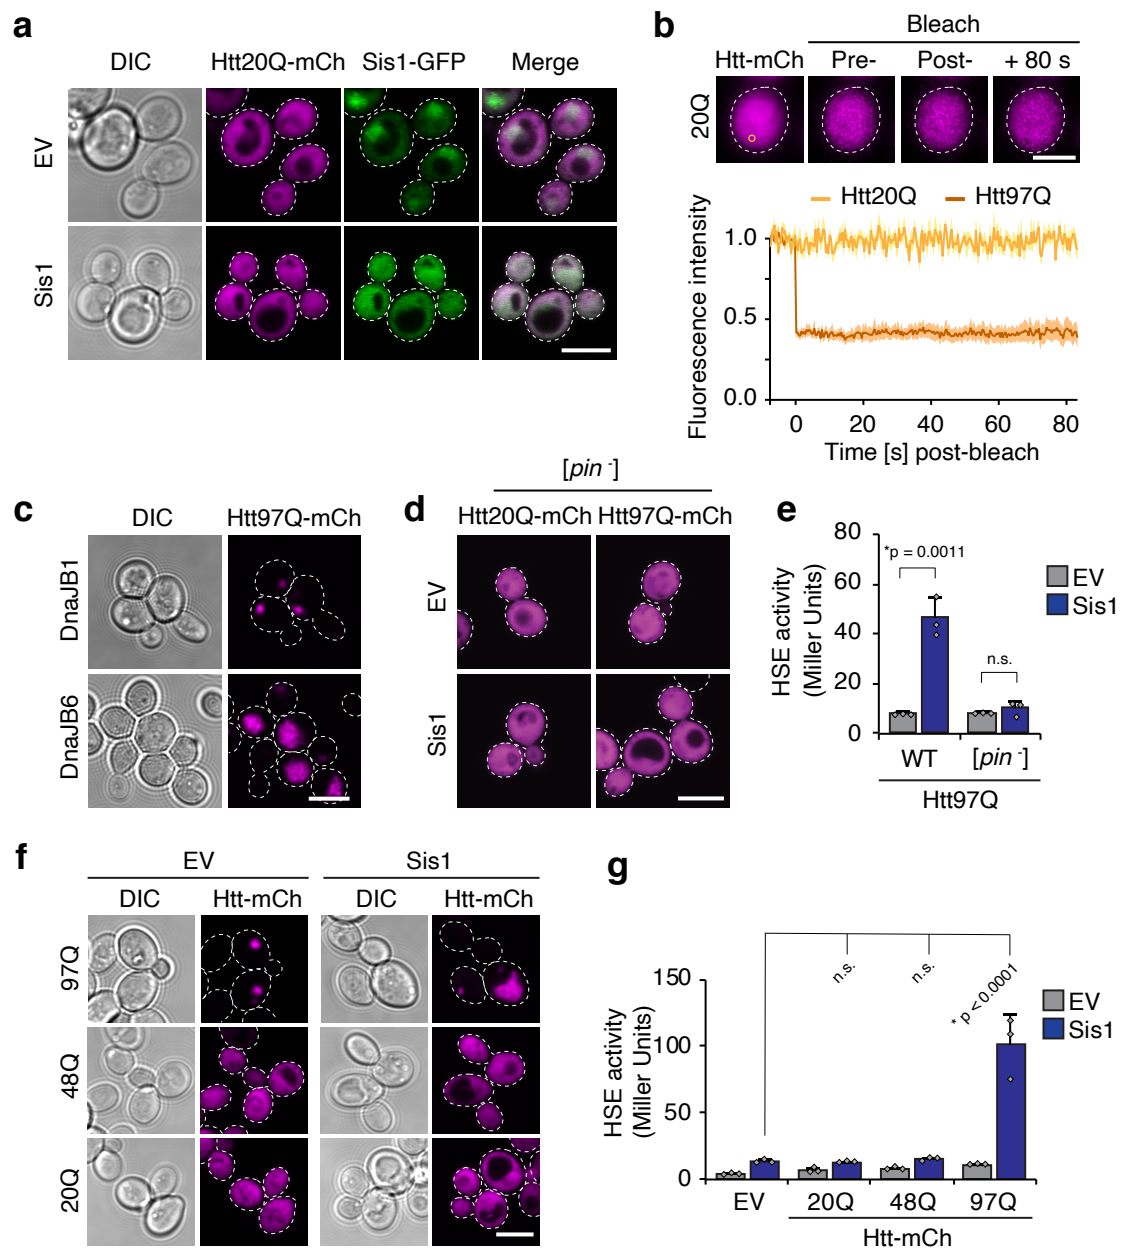

### Supplementary Fig. 3 | Sis1 affects physico-chemical aggregate

**properties.** **a**, Sis1 localizes to the cytosol and nucleus. Confocal images of cells containing endogenously tagged Sis1-GFP and expressing Htt20Q with or without Sis1 overexpression as in Fig. 2. Scale bar = 5  $\mu$ m. Experiments were performed in triplicate, representative images shown. See also Fig. 3a. **b**, Soluble Htt20Q is highly mobile. Fluorescence recovery after photo bleaching (FRAP) experiments were performed on cells expressing soluble Htt20Q-mCherry. Representative images pre- and post-bleach are shown (top), scale bar = 2.5 $\mu$ m. Data represent mean (solid lines)  $\pm$  SE (traces) of fluorescence intensity of at least 3 experimental replicates (bottom). Htt97Q is shown as a comparison (see also Fig. 3d). **c**, DnaJB6 affects Htt aggregates. Confocal microscopy of cells expressing Htt97Q with overexpression of DnaJB1 or DnaJB6. Scale bar = 5 $\mu$ m. Experiments were performed in triplicate, representative images shown. **d**, Htt97Q is diffusely distributed in [*pin*<sup>-</sup>] cells. Confocal microscopy was performed on [*pin*<sup>-</sup>] cells expressing Htt20Q or Htt97Q. Scale bar = 5 $\mu$ m.

Experiments were performed in triplicate, representative images shown. **e**, The stress response to Htt97Q is dependent on prion aggregates.  $\beta$ -Galactosidase activity was measured in WT [*PIN*<sup>+</sup>] or [*pin*<sup>-</sup>] cells containing P<sub>HSE</sub>LacZ and Htt97Q with or without Sis1 overexpression. EV, empty vector. Data represent mean + SD from 3 independent experiments. \*, p values were calculated by unpaired, two-sided t-test. n.s., not statistically significant. **f**, Medium length polyQ-expanded Htt (Htt48Q) does not form aggregates. Confocal microscopy was performed on cells expressing Htt20Q, Htt48Q or Htt97Q with or without Sis1 overexpression. EV, empty vector. Scale bar = 5 $\mu$ m. Experiments were performed in triplicate, representative images shown. **g**, Sis1 dependent HSR induction is dependent on polyQ length. P<sub>HSE</sub>LacZ activity was measured in cells expressing Htt20Q, Htt48Q or Htt97Q with or without Sis1 overexpression. EV, empty vector. Data represent mean + SD of 3 independent experiments. \*, p values were determined by Dunnett's multiple comparisons t-test to EV control with Sis1. n.s., not statistically significant.

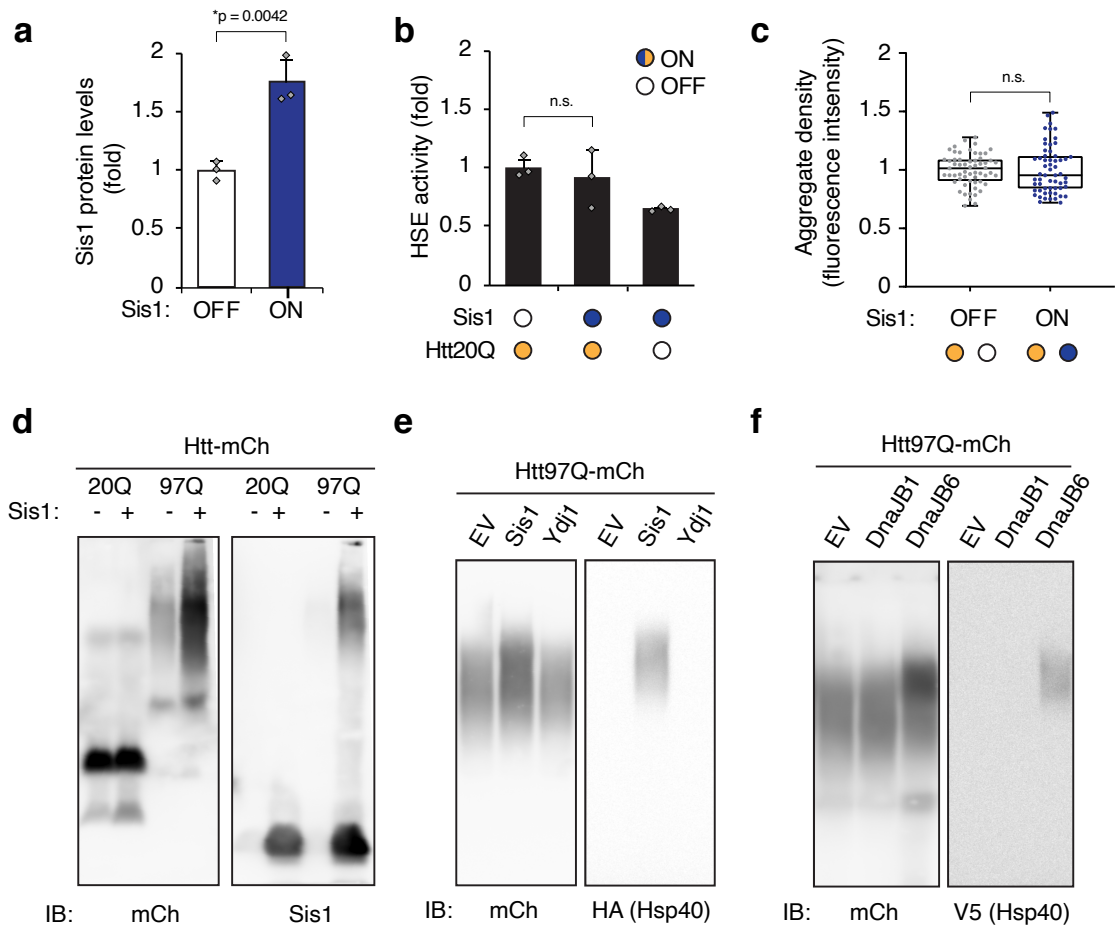

**Supplementary Fig. 4 | Sis1 acts on soluble polyQ oligomers.** **a**, Levels of Sis1 upon transient overexpression. Lysates from cells with or without transient Sis1 overexpression were analyzed by SDS-PAGE and immunoblotting for Sis1 and PGK as a loading control. Data represent mean + SD from 3 independent experiments. \*, p value was determined using unpaired, two-sided t-test. **b**, Htt20Q expression does not induce a stress response with or without transient Sis1 expression.  $P_{HSE}LacZ$  activities were measured in cells treated as in Fig. 4a. Htt20Q was expressed in cells for ~18 h (orange dot). Htt20Q expression was then continued for 3 h without or with Sis1 overexpression (blue and orange dot). In a third reaction, Htt20Q expression was stopped by the addition of glucose and Sis1 was overexpressed for 3 h (blue dot).  $P_{HSE}LacZ$  activities were measured. Experiments were performed in triplicate. Data represent mean + SD from 3 independent experiments. n.s.,  $p > 0.05$  by unpaired, two-sided t-test. See also Fig. 4b. **c**, Preformed Htt97Q aggregates are of similar density with and without transient overexpression of Sis1. Confocal microscopy was performed on cells expressing Htt97Q for 24 h (orange dot) without Sis1 overexpression (Sis1 OFF; empty dot) or with Sis1 overexpression for the final 3 h (Sis1 ON; blue dot). Average fluorescence intensity of aggregates was measured (see Methods for details). Box plots represent median and 25<sup>th</sup> and 75<sup>th</sup> percentile, and whiskers minimal and maximal values.  $n = 59$  cells. n.s.,  $p > 0.05$  by unpaired, two-sided t-test. See also Fig. 4c. **d**, Sis1 mediated polyQ oligomer formation is specific to Htt97Q. Lysates from cells expressing Htt20Q or Htt97Q with or without Sis1



overexpression were analyzed by SDD-AGE and immunoblotted for mCherry (Htt) or Sis1 as in Fig. 4d. Representative results of 3 independent experiments are shown. **e**, Ydj1 does not bind to soluble Htt97Q oligomers. Lysates from cells expressing Htt97Q with or without HA- tagged Sis1 or Ydj1 overexpression were analyzed by SDD-AGE and immunoblotting for mCherry (Htt97Q) or HA (Sis1, Ydj1) as in (d). EV, empty vector. **f**, DnaJB6 binds to soluble Htt97Q oligomers. Lysates from cells expressing Htt97Q with overexpression of DnaJB1 or DnaJB6 were analyzed by SDDAGE. Immunoblotting was performed for mCherry (Htt97Q) and the V5 epitope (DnaJB1 and DnaJB6). EV, empty vector. Representative blots of 3 independent experiments are shown.

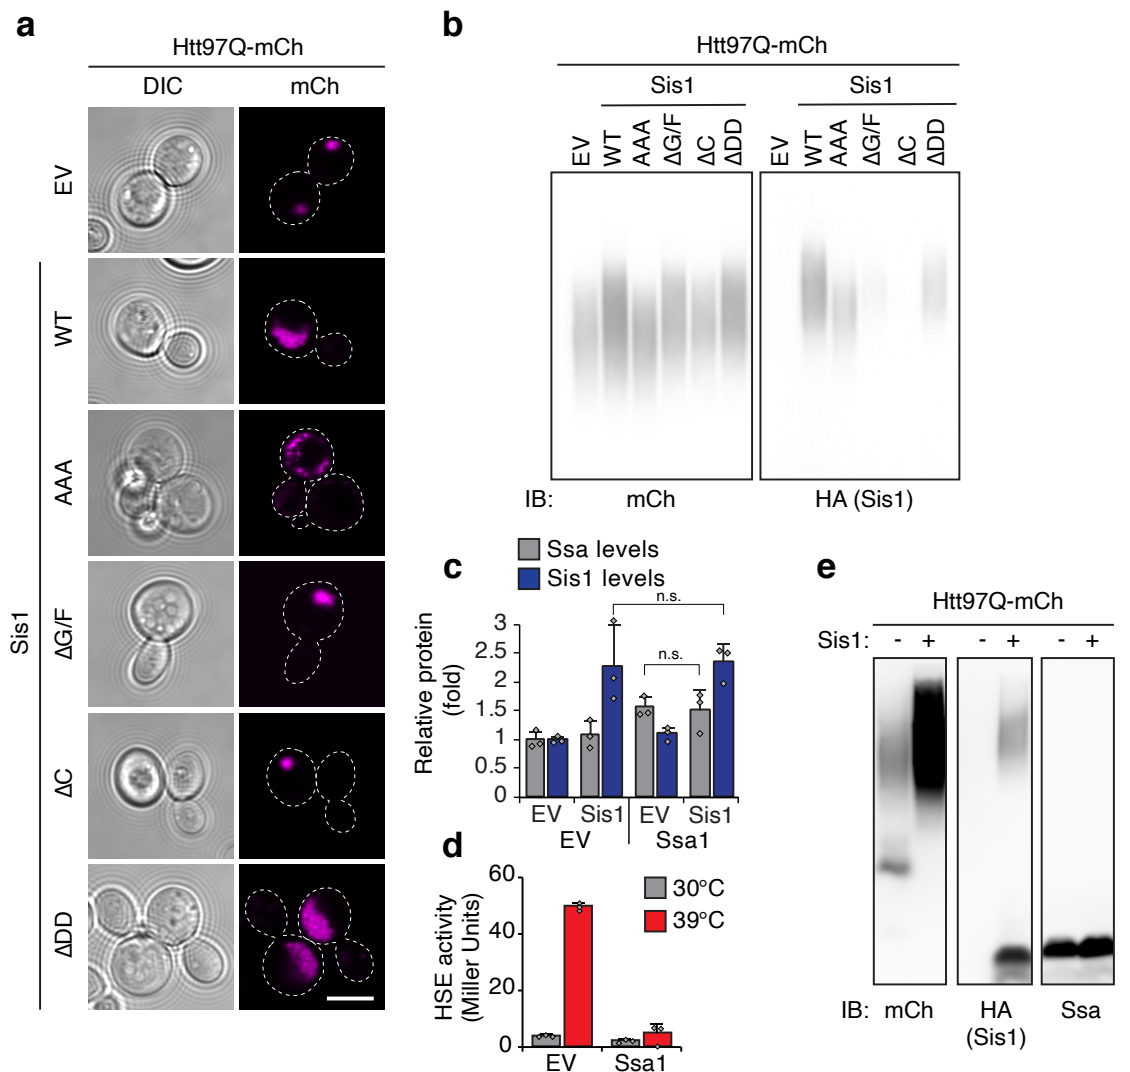

**Supplementary Fig. 5 | Sis1 recruits Hsp70 (Ssa1/2) to polyQ expanded Htt.** **a**, Formation of cloud-like polyQ condensates corresponds to stress response induction. Confocal imaging was performed on cells expressing Htt97Q and overexpression of WT Sis1 and Sis1 mutants (see Fig. 5a, b). EV, empty vector. Scale bar = 5 $\mu$ m. Experiments were performed in triplicate, representative images shown. **b**, Sis1 mutants Sis1 $\Delta$ G/F and Sis1 $\Delta$ C are defective in binding Htt97Q oligomers. Lysates from cells expressing Htt97Q and HA-tagged Sis1 proteins were analyzed by SDD-AGE and immunoblotting for mCherry (Htt97Q) and HA (Sis1). Representative blots of 3 independent experiments are shown. **c**, Ssa1 overexpression levels. Cells overexpressing Sis1 and Ssa1 either alone or in combination were analyzed by SDS-PAGE and immunoblotting for Ssa1/2, Sis1, and PGK. Note that due to a high level of homology, the Ssa antibody used recognizes both Ssa1 and Ssa2. Data represent mean + SD of three experiments. n.s.,  $p > 0.05$  by unpaired, two-sided t-test. **d**, Ssa1 overexpression blocks the heat induced stress response.  $P_{HSE}LacZ$  activity was measured in cells with or without Ssa1 overexpression grown at 30°C with or without a 1 h treatment at 39°C. Data represent mean + SD from 3 independent experiments. **e**, Interaction of Htt97Q with Ssa1/2 is less stable than with Sis1. Lysates from cells expressing Htt97Q with or without HA-Sis1 overexpression were analyzed by SDD-AGE as in (b). Immunoblotting was performed for mCherry (mCh, Htt97Q), HA (Sis1), or Ssa1/2. Representative blots from 3 experiments are shown.

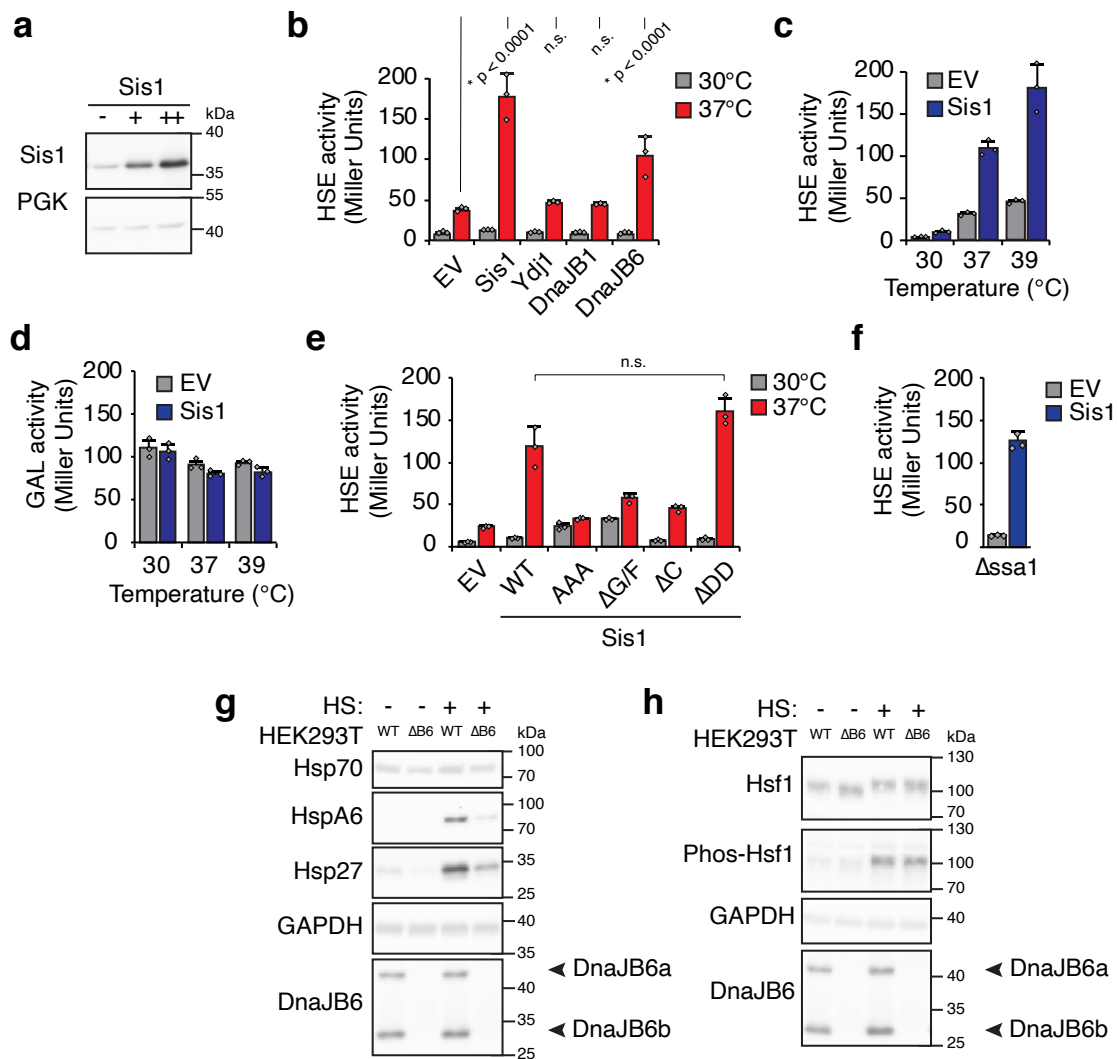

**Supplementary Fig. 6 | Sis1 overexpression enhances the cytosolic stress response.** **a**, Sis1 overexpression under different promoters. Lysates from cells expressing Sis1 at endogenous (EV, -), mildly elevated ( $P_{CYC}$ Sis1, +) or highly elevated ( $P_{GPD}$ Sis1, ++) levels were analyzed by SDS-PAGE and immunoblotting for Sis1 and PGK as a loading control as in Fig. S2B. Representative blots from 3 independent experiments are shown. **b**, DnaJB6 enhances the heat induced stress response.  $\beta$ -galactosidase activity was measured in yeast cells expressing various Hsp40s grown at 30°C and either maintained at 30°C or exposed to 37°C for 1 h. EV, empty vector. Data represent mean + SD from 3 independent experiments. \*, p values were calculated by Dunnett's multiple comparisons t-test to EV control at 37°C. n.s., not statistically significant. **c**, Sis1 enhances the stress response at different temperatures.  $\beta$ -galactosidase activity was measured in cells with or without Sis1 overexpression grown at 30°C and either maintained at 30°C or shifted to 37°C or 39°C for 1 h. Data represent mean + SD from 3 independent experiments. **d**, Increased temperature does not affect reporter fidelity with or without Sis1 overexpression.  $\beta$ -Galactosidase activity was measured in cells containing the galactose-inducible  $P_{GAL}$ LacZ reporter, grown in inducing media (galactose) and treated at different temperatures as in (c) with or without Sis1 overexpression. Data represent mean + SD from 3 independent experiments. **e**, Mutational analysis of Sis1 function in enhancing heat induced stress activation.  $P_{HSE}$ LacZ activity was measured in cells overexpressing various Sis1 mutant

proteins (see Fig. 5a, b) and exposed to 37°C heat stress as in (b). Data represent mean + SD from 3 independent experiments. n.s.,  $p > 0.05$  by unpaired, two-sided t-test. **f**, *Sis1* overexpression causes a stress response in  $\Delta$ *SSA1* cells at normal growth temperature.  $\beta$ -Galactosidase activity was measured in cells lacking *SSA1* with or without *Sis1* overexpression at 30°C. Data represent mean + SD from 3 independent experiments. **g**, DnaJB6 is required for efficient heat induced stress response in mammalian cell culture. Lysates from WT HEK293T cells or cells deleted for DnaJB6 ( $\Delta$ B6) grown at 37°C without or with a 1 h treatment at 43°C and recovery (heat stress, HS) were analyzed by SDS-PAGE and immunoblotting for the indicated proteins. Blots are representative of three independent experiments. **h**, DnaJB6 is not required for efficient phosphorylation of HSF1 during heat stress. Lysates from WT HEK293T cells or cells deleted for DnaJB6 ( $\Delta$ B6) grown at 37°C without or with a 1 h treatment at 43°C treatment (HS) were analyzed by SDS-PAGE and immunoblotting for the indicated proteins. Blots are representative of three independent experiments.

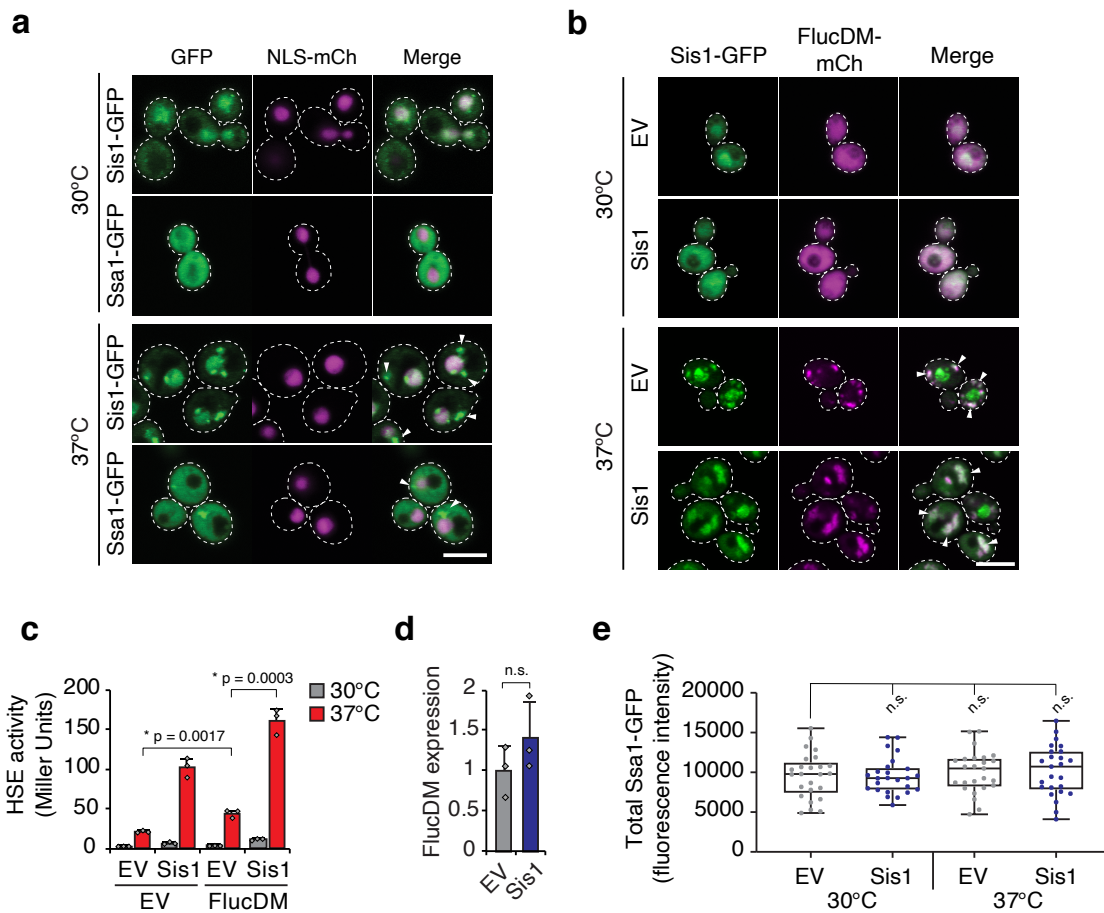

### Supplementary Fig. 7 | Sis1 recruits Ssa1 to heat-induced protein aggregates.

**a**, Confocal microscopy was performed on cells containing an endogenously tagged *SIS1-GFP* or a copy of *SSA1-GFP* under the *ADH* promoter and expressing nuclear targeted mCherry grown at 30°C. Cells were either maintained at 30°C or incubated at 37°C for 1 h. White arrows indicate cytosolic foci. Scale bars = 5µm. Experiments were performed in triplicate, representative images shown. **b**, Co-localization of Sis1 with FlucDM aggregates. Confocal microscopy was performed on cells containing an endogenously tagged *SIS1-GFP* and expressing FlucDM with or without Sis1 co-overexpression grown at 30°C and either maintained at 30°C or incubated at 37°C for 1 h. White arrows indicate co-localized aggregates. Scale bars = 5µm. Experiments were performed in triplicate, representative images shown. **c**, FlucDM induced stress response is enhanced by Sis1. P<sub>HSE</sub>LacZ reporter cells expressing either EV or FlucDM-mCh with or without Sis1 overexpression were subjected to heat stress at 37°C for 1 h before measurement of β-galactosidase activity. Data represent mean + SD from 3 independent experiments. \*, p values represent the results from unpaired, two-sided t-tests. **d**, FlucDM-mCh expression was measured in strains with or without Sis1 overexpression. Data represent mean + SD from 3 experiments. n.s., p > 0.05 by unpaired, two-sided t-test. **e**, Total Ssa1-GFP levels were measured by fluorescence in *SSA1-GFP* strains expressing FlucDM-mCh with or without Sis1 overexpression grown at 30°C and either maintained at 30°C or incubated at 37°C for 1 h. Box plots represent median and 25<sup>th</sup> and 75<sup>th</sup> percentile, and whiskers minimal and maximal values. n = 25 cells. n.s., p > 0.05 by Dunnett's multiple comparisons t-test to EV control cells at 30°C. See also Fig. 6d.

## Supplementary Tables

**Supplementary Table 1 | Chaperone screen for Htt97Q mediated induction of the stress response.** P<sub>HSE</sub>LacZ activity (HSE activity) was measured in cells expressing Htt97Q and each of the listed chaperone proteins from a 2-micron, multi-copy, galactose-inducible library. Red, high; blue, low HSE activity. Significant hits were subjected to further screening in triplicate with Htt20Q and Htt97Q. Secondary hits identified as Htt97Q specific ( $p > 0.05$  for Htt20Q vs. empty vector (EV) and  $p < 0.05$  for Htt97Q vs. Htt20Q by unpaired, two-sided t-test) are marked in bold. See also Fig. 2a and Supplementary Fig. 2a.

| Primary Screen |       |              |                  | Secondary Screen |            |           |                   |               |
|----------------|-------|--------------|------------------|------------------|------------|-----------|-------------------|---------------|
| Locus          | Name  | HSE Activity | Type             | Htt20Q           | Avg        | SD        | p (vs. EV)        | p (97 vs. 20) |
| YBR227C        | MCX1  | 13           | AAA+             | EV               | 12.826576  | 2.1846541 | -                 | 0.9982        |
| YPL235W        | RVB2  | 23           | AAA+             | SSE1             | 60.532422  | 7.810914  | 0.0005            | 0.5111        |
| YDR212W        | CCT1  | 21           | CCT              | SIS1             | 24.100524  | 8.9442409 | <b>0.1012</b>     | <b>0.0413</b> |
| YDL143W        | CCT4  | 25           | CCT              | XDJ1             | 28.202575  | 12.104521 | <b>0.0963</b>     | 0.1935        |
| YDR188W        | CCT6  | 32           | CCT              | SSZ1             | 36.543376  | 3.5865615 | 0.0006            | <b>0.0485</b> |
| YJL111W        | CCT7  | 27           | CCT              | SSE2             | 37.167786  | 4.2486281 | 0.0009            | 0.2203        |
| YJL008C        | CCT8  | 14           | CCT              | YDJ1             | 57.066307  | 32.236623 | <b>0.0767</b>     | 0.3478        |
| YOR020C        | HSP10 | 13           | Hsp10            |                  |            |           |                   |               |
| YER048C        | CAJ1  | 17           | Hsp40            |                  |            |           |                   |               |
| YIR004W        | DJP1  | 28           | Hsp40            | <b>Htt97Q</b>    | <b>Avg</b> | <b>SD</b> | <b>p (vs. EV)</b> |               |
| YFR041C        | ERJ5  | 28           | Hsp40            | EV               | 12.841012  | 9.9847483 | -                 |               |
| YJL073W        | JEM1  | 30           | Hsp40            | SSE1             | 57.158045  | 2.1906806 | 0.0017            |               |
| YNL227C        | JJJ1  | 29           | Hsp40            | SIS1             | 39.740551  | 1.8467804 | 0.0101            |               |
| YNL328C        | MDJ2  | 21           | Hsp40            | XDJ1             | 42.686363  | 10.566526 | 0.0237            |               |
| YNL007C        | SIS1  | 62           | Hsp40            | SSZ1             | 52.343609  | 9.0704405 | 0.0071            |               |
| YLR008C        | TIM14 | 16           | Hsp40            | SSE2             | 46.181645  | 9.8836444 | 0.0147            |               |
| YLR090W        | XDJ1  | 57           | Hsp40            | YDJ1             | 36.908868  | 6.346612  | 0.0244            |               |
| YNL064C        | YDJ1  | 49           | Hsp40            |                  |            |           |                   |               |
| YGR285C        | ZUO1  | 40           | Hsp40            |                  |            |           |                   |               |
| YLR259C        | HSP60 | 12           | Hsp60            |                  |            |           |                   |               |
| YJL034W        | KAR2  | 31           | Hsp70            |                  |            |           |                   |               |
| YKL073W        | LHS1  | 23           | Hsp70            |                  |            |           |                   |               |
| YAL005C        | SSA1  | 19           | Hsp70            |                  |            |           |                   |               |
| YLL024C        | SSA2  | 20           | Hsp70            |                  |            |           |                   |               |
| YBL075C        | SSA3  | 21           | Hsp70            |                  |            |           |                   |               |
| YER103W        | SSA4  | 15           | Hsp70            |                  |            |           |                   |               |
| YNL209W        | SSB2  | 38           | Hsp70            |                  |            |           |                   |               |
| YLR369W        | SSC2  | 14           | Hsp70            |                  |            |           |                   |               |
| YEL030W        | SSC3  | 14           | Hsp70            |                  |            |           |                   |               |
| YPL106C        | SSE1  | 70           | Hsp70            |                  |            |           |                   |               |
| YBR169C        | SSE2  | 53           | Hsp70            |                  |            |           |                   |               |
| YHR064C        | SSZ1  | 54           | Hsp70            |                  |            |           |                   |               |
| YOL031C        | SIL1  | 35           | Hsp70 cofactors  |                  |            |           |                   |               |
| YIL016W        | SNL1  | 26           | Hsp70 cofactors  |                  |            |           |                   |               |
| YMR186W        | HSC82 | 41           | Hsp90            |                  |            |           |                   |               |
| YPL240C        | HSP82 | 35           | Hsp90            |                  |            |           |                   |               |
| YDR214W        | AHA1  | 29           | Hsp90 cofactors  |                  |            |           |                   |               |
| YDR168W        | CDC37 | 39           | Hsp90 cofactors  |                  |            |           |                   |               |
| YJR032W        | CPR7  | 31           | Hsp90 cofactors  |                  |            |           |                   |               |
| YNL281W        | HCH1  | 27           | Hsp90 cofactors  |                  |            |           |                   |               |
| YHR034C        | PIH1  | 11           | Hsp90 cofactors  |                  |            |           |                   |               |
| YOR027W        | STH1  | 32           | Hsp90 cofactors  |                  |            |           |                   |               |
| YCR060W        | TAH1  | 18           | Hsp90 cofactors  |                  |            |           |                   |               |
| YEL003W        | GIM4  | 16           | Prefoldin        |                  |            |           |                   |               |
| YFL014W        | HSP12 | 24           | Small heat shock |                  |            |           |                   |               |
| YDR533C        | HSP31 | 15           | Small heat shock |                  |            |           |                   |               |
| YPL280W        | HSP32 | 20           | Small heat shock |                  |            |           |                   |               |
| YOR391C        | HSP33 | 17           | Small heat shock |                  |            |           |                   |               |
| YMR322C        | HSP34 | 17           | Small heat shock |                  |            |           |                   |               |
| YDR171W        | HSP42 | 23           | Small heat shock |                  |            |           |                   |               |
|                | Avg   | 28           |                  |                  |            |           |                   |               |
|                | SD    | 14           |                  |                  |            |           |                   |               |

**Supplementary Table 2 | GO term enrichment over control.** mRNA sequencing was performed on cells expressing empty vector (EV) control, Sis1, Htt97Q, and Sis1 with Htt97Q. The top GO biological processes are listed for the differentially upregulated genes for each condition compared to the EV control. See also Fig. 2c. p values were calculated using the Goseq R package, which corrects for gene length bias. Black text indicates significant terms ( $p < 0.05$ ), gray text represents not significant terms ( $p > 0.05$ ).

**Sis1 vs. EV**

| GO_accession | p value | Description                                      |
|--------------|---------|--------------------------------------------------|
| GO:0006635   | 0.4402  | fatty acid beta-oxidation                        |
| GO:0019395   | 0.4402  | fatty acid oxidation                             |
| GO:0034440   | 0.4402  | lipid oxidation                                  |
| GO:0009062   | 0.64612 | fatty acid catabolic process                     |
| GO:0044282   | 0.70669 | small molecule catabolic process                 |
| GO:0044767   | 0.70669 | single-organism developmental process            |
| GO:0032502   | 0.70669 | developmental process                            |
| GO:0072329   | 0.70669 | monocarboxylic acid catabolic process            |
| GO:0033540   | 0.70669 | fatty acid beta-oxidation using acyl-CoA oxidase |
| GO:0003006   | 0.70669 | developmental process involved in reproduction   |
| GO:1901135   | 0.76527 | carbohydrate derivative metabolic process        |
| GO:0044242   | 0.76527 | cellular lipid catabolic process                 |
| GO:0030258   | 0.76527 | lipid modification                               |
| GO:0044712   | 0.94661 | single-organism catabolic process                |
| GO:0016042   | 1       | lipid catabolic process                          |
| GO:0009653   | 1       | anatomical structure morphogenesis               |
| GO:0048856   | 1       | anatomical structure development                 |
| GO:0055114   | 1       | oxidation-reduction process                      |
| GO:0070843   | 1       | misfolded protein transport                      |
| GO:0019953   | 1       | sexual reproduction                              |

**Htt97Q vs. EV**

| GO_accession | p value  | Description                                                                                        |
|--------------|----------|----------------------------------------------------------------------------------------------------|
| GO:0042254   | 9.51E-20 | ribosome biogenesis                                                                                |
| GO:0034470   | 8.98E-18 | ncRNA processing                                                                                   |
| GO:0022613   | 3.39E-17 | ribonucleoprotein complex biogenesis                                                               |
| GO:0006364   | 3.39E-17 | rRNA processing                                                                                    |
| GO:0016072   | 4.07E-16 | rRNA metabolic process                                                                             |
| GO:0034660   | 1.24E-15 | ncRNA metabolic process                                                                            |
| GO:0042274   | 3.37E-12 | ribosomal small subunit biogenesis                                                                 |
| GO:0000462   | 6.01E-12 | maturation of SSU-rRNA from tricistronic rRNA transcript (SSU-rRNA, 5.8S rRNA, LSU-rRNA)           |
| GO:0030490   | 1.71E-11 | maturation of SSU-rRNA                                                                             |
| GO:0042273   | 3.91E-10 | ribosomal large subunit biogenesis                                                                 |
| GO:0006396   | 6.49E-10 | RNA processing                                                                                     |
| GO:0000460   | 1.79E-07 | maturation of 5.8S rRNA                                                                            |
| GO:0000466   | 1.79E-07 | maturation of 5.8S rRNA from tricistronic rRNA transcript (SSU-rRNA, 5.8S rRNA, LSU-rRNA)          |
| GO:0010467   | 3.80E-06 | gene expression                                                                                    |
| GO:0000967   | 1.68E-05 | rRNA 5'-end processing                                                                             |
| GO:0034471   | 1.68E-05 | ncRNA 5'-end processing                                                                            |
| GO:0000469   | 1.81E-05 | cleavage involved in rRNA processing                                                               |
| GO:0000966   | 3.32E-05 | RNA 5'-end processing                                                                              |
| GO:0000480   | 5.21E-05 | endonucleolytic cleavage in 5'-ETS of tricistronic rRNA transcript (SSU-rRNA, 5.8S rRNA, LSU-rRNA) |
| GO:0044085   | 5.21E-05 | cellular component biogenesis                                                                      |

**Htt97Q+Sis1 vs. EV**

| GO_accession | p value  | Description                                                                |
|--------------|----------|----------------------------------------------------------------------------|
| GO:0006457   | 3.53E-13 | protein folding                                                            |
| GO:0042026   | 3.75E-12 | protein refolding                                                          |
| GO:0043248   | 2.65E-05 | proteasome assembly                                                        |
| GO:0009266   | 0.000195 | response to temperature stimulus                                           |
| GO:0006950   | 0.000345 | response to stress                                                         |
| GO:0009408   | 0.000345 | response to heat                                                           |
| GO:0009628   | 0.001923 | response to abiotic stimulus                                               |
| GO:0043462   | 0.001982 | regulation of ATPase activity                                              |
| GO:0006200   | 0.003947 | obsolete ATP catabolic process                                             |
| GO:0033554   | 0.005941 | cellular response to stress                                                |
| GO:0006515   | 0.005941 | misfolded or incompletely synthesized protein catabolic process            |
| GO:0006616   | 0.006065 | SRP-dependent cotranslational protein targeting to membrane, translocation |
| GO:0032781   | 0.006065 | positive regulation of ATPase activity                                     |
| GO:0006458   | 0.006072 | 'de novo' protein folding                                                  |
| GO:0034605   | 0.006092 | cellular response to heat                                                  |
| GO:0042274   | 0.007524 | ribosomal small subunit biogenesis                                         |
| GO:0051603   | 0.011119 | proteolysis involved in cellular protein catabolic process                 |
| GO:0044257   | 0.013268 | cellular protein catabolic process                                         |
| GO:0030490   | 0.017543 | maturation of SSU-rRNA                                                     |
| GO:0045047   | 0.020527 | protein targeting to ER                                                    |

**Supplementary Table 3 | mRNA enrichment with Htt97Q and Sis1.** mRNA sequencing was performed on cells expressing Htt97Q without or with Sis1 overexpression. Genes enriched with Sis1 overexpression are listed. p values were determined using the DESeq R package and adjusted using the Benjamini and Hochberg method. See also Fig. 2d and Supplementary Fig. 2h, i.

| ID        | log2FoldChange | p value   | Gene name |
|-----------|----------------|-----------|-----------|
| YNL007C   | 4.541          | 1.962E-98 | SIS1      |
| YER103W   | 2.675          | 3.405E-06 | SSA4      |
| YGR142W   | 2.645          | 6.607E-13 | BTN2      |
| YPL240C   | 2.358          | 2.010E-12 | HSP82     |
| YDR070C   | 1.727          | 5.483E-10 | FMP16     |
| YGR211W   | 1.631          | 3.211E-10 | ZPR1      |
| YNL194C   | 1.522          | 2.107E-03 | -         |
| YLL024C   | 1.508          | 1.792E-22 | SSA2      |
| YGR236C   | 1.465          | 1.274E-02 | SPG1      |
| YBR101C   | 1.434          | 2.113E-09 | FES1      |
| YOR027W   | 1.293          | 4.298E-27 | STI1      |
| YAL005C   | 1.228          | 4.298E-27 | SSA1      |
| YBL075C   | 1.224          | 5.748E-03 | SSA3      |
| YDR171W   | 1.212          | 7.672E-06 | HSP42     |
| YMR245W   | 1.190          | 1.294E-15 | -         |
| YML128C   | 1.134          | 7.825E-08 | MSC1      |
| YJL144W   | 1.118          | 1.003E-02 | -         |
| YBR169C   | 1.104          | 3.855E-04 | SSE2      |
| YDL204W   | 1.090          | 4.790E-03 | RTN2      |
| YFL014W   | 1.089          | 3.170E-15 | HSP12     |
| YHR087W   | 1.063          | 1.570E-10 | RTC3      |
| YLR216C   | 1.054          | 5.496E-27 | CPR6      |
| YLL026W   | 1.050          | 3.231E-05 | HSP104    |
| YNL077W   | 1.001          | 2.899E-04 | APJ1      |
| YDR155C   | 0.988          | 3.554E-06 | CPR1      |
| YMR169C   | 0.963          | 4.818E-10 | ALD3      |
| YMR175W   | 0.946          | 3.091E-02 | SIP18     |
| YEL021W   | 0.941          | 8.429E-25 | URA3      |
| YDL222C   | 0.940          | 3.161E-02 | FMP45     |
| YCL048W-A | 0.936          | 1.174E-06 | -         |
| YKR106W   | 0.935          | 2.350E-07 | GEX2      |
| YNL195C   | 0.934          | 2.800E-12 | -         |
| YGR248W   | 0.907          | 1.260E-08 | SOL4      |
| YMR186W   | 0.897          | 2.713E-22 | HSC82     |
| YDL085W   | 0.881          | 5.379E-08 | NDE2      |
| YNL064C   | 0.874          | 2.688E-20 | YDJ1      |
| YLR109W   | 0.860          | 1.922E-12 | AHP1      |
| YMR090W   | 0.859          | 7.478E-11 | -         |
| YLR164W   | 0.828          | 1.735E-05 | SHH4      |
| YBR285W   | 0.810          | 2.583E-08 | -         |
| YLR178C   | 0.808          | 2.199E-05 | TFS1      |
| YMR174C   | 0.805          | 1.003E-02 | PAI3      |
| YOR173W   | 0.796          | 2.825E-05 | DCS2      |
| YGR043C   | 0.792          | 9.285E-11 | NQM1      |
| YMR250W   | 0.783          | 3.194E-06 | GAD1      |



|           |       |           |        |
|-----------|-------|-----------|--------|
| YOR161C   | 0.778 | 7.294E-09 | PNS1   |
| YDR214W   | 0.769 | 2.803E-14 | AHA1   |
| YOR007C   | 0.766 | 8.386E-16 | SGT2   |
| YOL032W   | 0.758 | 6.680E-05 | OPI10  |
| YNL006W   | 0.757 | 1.003E-02 | LST8   |
| YIL136W   | 0.734 | 1.058E-02 | OM45   |
| YDR258C   | 0.734 | 2.967E-02 | HSP78  |
| YKL065W-A | 0.716 | 2.743E-02 | -      |
| YJL042W   | 0.704 | 3.262E-03 | MHP1   |
| YNR069C   | 0.702 | 2.779E-02 | BSC5   |
| YGR201C   | 0.697 | 1.370E-05 | -      |
| YCR012W   | 0.691 | 1.289E-02 | PGK1   |
| tN(GUU)P  | 0.687 | 2.642E-02 | -      |
| YDL024C   | 0.682 | 3.129E-02 | DIA3   |
| YJL163C   | 0.678 | 1.358E-05 | -      |
| YCL050C   | 0.667 | 1.643E-06 | APA1   |
| YIL101C   | 0.659 | 1.586E-02 | XBP1   |
| YHR054C   | 0.636 | 4.453E-02 | -      |
| YGL184C   | 0.618 | 1.970E-04 | STR3   |
| YPL123C   | 0.615 | 2.169E-03 | RNY1   |
| YER121W   | 0.612 | 3.241E-02 | -      |
| YPL124W   | 0.611 | 7.119E-03 | SPC29  |
| YFL016C   | 0.607 | 1.187E-03 | MDJ1   |
| YJR046W   | 0.601 | 2.243E-04 | TAH11  |
| YEL011W   | 0.600 | 6.063E-03 | GLC3   |
| YPL186C   | 0.579 | 2.587E-03 | UIP4   |
| YPL151C   | 0.569 | 7.330E-06 | PRP46  |
| YOR374W   | 0.569 | 2.087E-02 | ALD4   |
| YPR184W   | 0.567 | 8.357E-08 | GDB1   |
| YPR149W   | 0.563 | 7.373E-04 | NCE102 |
| YPR154W   | 0.556 | 7.684E-04 | PIN3   |
| YPL106C   | 0.547 | 2.644E-08 | SSE1   |
| YAL061W   | 0.546 | 2.734E-03 | BDH2   |
| YOL157C   | 0.544 | 3.795E-02 | IMA2   |
| YGL104C   | 0.544 | 6.692E-04 | VPS73  |
| YPL239W   | 0.543 | 6.834E-06 | YAR1   |
| YJL170C   | 0.541 | 1.933E-02 | ASG7   |
| YLR259C   | 0.541 | 6.935E-08 | HSP60  |
| YGR256W   | 0.540 | 5.114E-03 | GND2   |
| YDR089W   | 0.535 | 4.213E-02 | -      |
| YJL034W   | 0.533 | 4.039E-04 | KAR2   |
| YPL170W   | 0.531 | 3.902E-03 | DAP1   |
| YOL081W   | 0.529 | 3.945E-03 | IRA2   |
| YHR171W   | 0.521 | 5.956E-03 | ATG7   |
| YLR151C   | 0.519 | 4.097E-04 | PCD1   |
| YMR105C   | 0.518 | 3.418E-03 | PGM2   |
| YNL214W   | 0.516 | 1.320E-02 | PEX17  |
| YHR049W   | 0.516 | 3.554E-06 | FSH1   |
| YJL164C   | 0.512 | 4.321E-04 | TPK1   |
| YHR174W   | 0.512 | 1.465E-07 | ENO2   |
| YOR114W   | 0.502 | 1.752E-02 | -      |
| YER091C   | 0.498 | 5.742E-04 | MET6   |
| YOR020C   | 0.493 | 2.797E-06 | HSP10  |

|           |       |           |       |
|-----------|-------|-----------|-------|
| YIL119C   | 0.493 | 1.098E-02 | RPI1  |
| YBR157C   | 0.491 | 1.244E-02 | ICS2  |
| YLR082C   | 0.487 | 4.359E-03 | SRL2  |
| YPR026W   | 0.486 | 3.091E-02 | ATH1  |
| YBL039W-B | 0.483 | 2.743E-02 | -     |
| YIR038C   | 0.476 | 3.877E-03 | GTT1  |
| YER096W   | 0.472 | 4.458E-02 | SHC1  |
| YFR053C   | 0.469 | 4.620E-02 | HXK1  |
| YNL281W   | 0.469 | 5.580E-05 | HCH1  |
| YHR104W   | 0.467 | 4.328E-02 | GRE3  |
| YOL151W   | 0.464 | 2.150E-02 | GRE2  |
| YLR327C   | 0.464 | 8.505E-04 | TMA10 |
| YPR160W   | 0.461 | 8.397E-04 | GPH1  |
| YNL300W   | 0.458 | 5.449E-05 | TOS6  |
| YGR284C   | 0.456 | 1.677E-04 | ERV29 |
| YDR151C   | 0.453 | 5.023E-04 | CTH1  |
| YKL035W   | 0.452 | 2.486E-05 | UGP1  |
| YGR008C   | 0.450 | 3.220E-02 | STF2  |
| YAL008W   | 0.448 | 3.346E-04 | FUN14 |
| YMR161W   | 0.440 | 9.808E-04 | HLJ1  |
| YIL139C   | 0.439 | 3.129E-02 | REV7  |
| YOL002C   | 0.432 | 2.350E-04 | IZH2  |
| YKL026C   | 0.427 | 3.705E-02 | GPX1  |
| YOR185C   | 0.427 | 1.428E-03 | GSP2  |
| YIL158W   | 0.426 | 6.242E-03 | AIM20 |
| YLL055W   | 0.426 | 1.393E-02 | YCT1  |
| YNL173C   | 0.426 | 3.552E-04 | MDG1  |
| YHR061C   | 0.424 | 3.084E-02 | GIC1  |
| YER142C   | 0.421 | 8.947E-03 | MAG1  |
| YBR026C   | 0.417 | 4.321E-04 | ETR1  |
| YJR047C   | 0.412 | 2.368E-02 | ANB1  |
| YMR196W   | 0.412 | 3.941E-02 | -     |
| YHR159W   | 0.411 | 3.593E-02 | TDA11 |
| YIR037W   | 0.410 | 3.952E-03 | HYR1  |
| YOR386W   | 0.410 | 3.112E-02 | PHR1  |
| YCL055W   | 0.409 | 2.180E-02 | KAR4  |
| YLR183C   | 0.406 | 1.751E-02 | TOS4  |
| YIL111W   | 0.406 | 1.700E-03 | COX5B |
| YBR241C   | 0.405 | 5.956E-03 | -     |
| YGL038C   | 0.405 | 1.519E-02 | OCH1  |
| YBR067C   | 0.404 | 1.935E-04 | TIP1  |
| YKL042W   | 0.404 | 4.436E-02 | SPC42 |
| YHR096C   | 0.399 | 1.365E-02 | HXT5  |
| YPR175W   | 0.399 | 3.848E-02 | DPB2  |
| YOL082W   | 0.396 | 5.956E-03 | ATG19 |
| YGL208W   | 0.396 | 2.645E-02 | SIP2  |
| YDL019C   | 0.395 | 2.510E-02 | OSH2  |
| YPL004C   | 0.394 | 4.047E-04 | LSP1  |
| YOR215C   | 0.392 | 4.866E-03 | AIM41 |
| YDR453C   | 0.390 | 3.875E-02 | TSA2  |
| YAR015W   | 0.389 | 3.583E-02 | ADE1  |
| YNL289W   | 0.388 | 1.711E-03 | PCL1  |
| YNL098C   | 0.387 | 3.129E-02 | RAS2  |

|           |       |           |        |
|-----------|-------|-----------|--------|
| YHL030W   | 0.386 | 1.043E-02 | ECM29  |
| YPL096W   | 0.384 | 2.433E-02 | PNG1   |
| YKR076W   | 0.383 | 6.689E-03 | ECM4   |
| YOL096C   | 0.383 | 1.787E-02 | COQ3   |
| YBR139W   | 0.382 | 2.722E-03 | -      |
| YLR219W   | 0.380 | 4.039E-03 | MSC3   |
| YLR303W   | 0.379 | 1.235E-03 | MET17  |
| YFL029C   | 0.379 | 2.201E-02 | CAK1   |
| YGL093W   | 0.377 | 2.196E-02 | SPC105 |
| YBR231C   | 0.375 | 1.757E-02 | SWC5   |
| YDR330W   | 0.373 | 8.353E-03 | UBX5   |
| YER052C   | 0.373 | 1.794E-02 | HOM3   |
| YMR199W   | 0.370 | 2.695E-03 | CLN1   |
| YNL200C   | 0.368 | 4.007E-03 | -      |
| YDL197C   | 0.366 | 1.995E-02 | ASF2   |
| YOL153C   | 0.363 | 1.528E-02 | -      |
| YOL101C   | 0.358 | 2.857E-02 | IZH4   |
| YFR003C   | 0.357 | 4.557E-02 | YPI1   |
| YGR192C   | 0.356 | 1.140E-03 | TDH3   |
| YBR082C   | 0.352 | 2.335E-03 | UBC4   |
| YER079W   | 0.351 | 1.586E-02 | -      |
| YLR356W   | 0.351 | 1.113E-02 | ATG33  |
| YER001W   | 0.351 | 4.028E-03 | MNN1   |
| YAR007C   | 0.348 | 2.329E-02 | RFA1   |
| YBL064C   | 0.346 | 1.647E-02 | PRX1   |
| YIL042C   | 0.345 | 2.461E-02 | PKP1   |
| YLR324W   | 0.343 | 1.852E-02 | PEX30  |
| YDR399W   | 0.343 | 6.849E-03 | HPT1   |
| YOR228C   | 0.342 | 3.241E-02 | MCP1   |
| YMR031C   | 0.337 | 6.045E-03 | EIS1   |
| YGR086C   | 0.336 | 4.169E-03 | PIL1   |
| YOR020W-A | 0.332 | 4.197E-02 | -      |
| YOL038W   | 0.328 | 9.527E-03 | PRE6   |
| YMR006C   | 0.325 | 1.431E-02 | PLB2   |
| YJL001W   | 0.324 | 1.003E-02 | PRE3   |
| YMR251W-A | 0.321 | 5.177E-03 | HOR7   |
| YBR126C   | 0.320 | 2.087E-02 | TPS1   |
| YPL203W   | 0.318 | 2.874E-02 | TPK2   |
| YGL037C   | 0.318 | 7.268E-03 | PNC1   |
| YDL144C   | 0.318 | 3.965E-02 | -      |
| YBR265W   | 0.317 | 3.504E-02 | TSC10  |
| YOR289W   | 0.314 | 4.649E-02 | -      |
| YGR209C   | 0.312 | 1.424E-02 | TRX2   |
| YDL078C   | 0.308 | 1.365E-02 | MDH3   |
| YGR210C   | 0.298 | 3.941E-02 | -      |
| YGR019W   | 0.294 | 4.455E-02 | UGA1   |
| YJR117W   | 0.293 | 3.673E-02 | STE24  |
| YDL110C   | 0.288 | 4.055E-02 | TMA17  |
| YBR025C   | 0.286 | 1.921E-02 | OLA1   |
| YLR270W   | 0.279 | 4.956E-02 | DCS1   |
| YBR286W   | 0.276 | 2.857E-02 | APE3   |

## Supplementary Table 4 | Plasmids used in this study.

| Plasmid name                                        | Source                      | Identifier       |
|-----------------------------------------------------|-----------------------------|------------------|
| pRS426                                              | (Christianson et al., 1992) | N/A              |
| pYES2-myc-20QmCh                                    | (Park et al., 2013)         | N/A              |
| pYES2-myc-97QmCh                                    | (Park et al., 2013)         | N/A              |
| pRS306P <sub>GPD</sub>                              | (Mumberg et al., 1995)      | N/A              |
| pGEX-2T                                             | GE Lifesciences             | Cat. #28-9546-53 |
| pFA6a-GFP(S65T)-KanMX6                              | (Bähler et al., 1998)       | N/A              |
| pRS306P <sub>GPD</sub> GST-GFP-NLS                  | This study                  | pCLK207          |
| pRS306P <sub>GPD</sub> GST-mCh-NLS                  | This study                  | pCLK181          |
| Ssa3-LacZ-Leu                                       | (Liu et al., 1997)          | N/A              |
| pRS414P <sub>GPD</sub>                              | (Mumberg et al., 1995)      | N/A              |
| pRS426Hsf1                                          | (Holmes et al., 2014)       | N/A              |
| pRS414P <sub>GPD</sub> Hsf1                         | This study                  | pCLK263          |
| pRS425P <sub>GAL</sub>                              | ATCC                        | Cat. #87331      |
| pRS425P <sub>GAL</sub> LacZ                         | This study                  | pCLK114          |
| pESCLEu                                             | Agilent                     | Cat. #217452     |
| pESCLEu-20QmCh                                      | This study                  | pCLK253          |
| pESCLEu-97QmCh                                      | This study                  | pCLK254          |
| pRS313P <sub>HSE</sub> LacZ                         | This study                  | pCLK270          |
| Yeast ORF Collection                                | Dharmacon                   | Cat. #YSC3868    |
| pRS414                                              | (Sikorski and Hieter, 1989) | N/A              |
| pRS414P <sub>GPD</sub> Sis1                         | (Douglas et al., 2008)      | Addgene #18687   |
| pRS414P <sub>GPD</sub> Ydj1                         | This study                  | pCLK323          |
| pRS414P <sub>GPD</sub> DnaJb1                       | This study                  | pCLK210          |
| pRS414P <sub>GPD</sub> DnaJb6                       | This study                  | pCLK211          |
| pYES2-Htt97Q-GFP                                    | (Ripaud et al., 2014)       | N/A              |
| pESCURA <sub>Rnq</sub> GFP                          | (Kaganovich et al., 2008)   | N/A              |
| P <sub>UPR</sub> LacZ                               | (Cox et al., 1993)          | N/A              |
| pFA6a-KanMX4                                        | (Wach et al., 1994)         | N/A              |
| pBacMam2-DiEx-LIC-C-flac_huntingtin_full-length_Q48 | (Harding et al., 2019)      | Addgene #111747  |
| pYES2-myc-48QmCh                                    | This study                  | pCLK334          |
| pCM184                                              | (Garí et al., 1997)         | N/A              |
| pCM184Sis1                                          | This study                  | pCLK75           |
| pRS414P <sub>GPD</sub> HASis1                       | This study                  | pCLK331          |
| pRS414P <sub>GPD</sub> HAYdj1                       | This study                  | pCLK330          |
| pRS414P <sub>GAL</sub> HASis1                       | This study                  | pCLK301          |
| pRS414P <sub>GAL</sub> HASis1AAA                    | This study                  | pCLK302          |
| pRS414P <sub>GAL</sub> HASis1DG/F                   | This study                  | pCLK304          |
| pRS414P <sub>GAL</sub> HASis1DC                     | This study                  | pCLK313          |
| pRS414P <sub>GAL</sub> HASis1DDD                    | This study                  | pCLK315          |
| pRS413P <sub>GPD</sub> Ssa1                         | This study                  | pCLK242          |
| pRS405P <sub>ADH</sub> Ssa1GFP                      | This study                  | pCLK295          |
| pRS413P <sub>CYC</sub>                              | (Mumberg et al., 1995)      | N/A              |
| pRS413P <sub>CYC</sub> Sis1                         | This study                  | pCLK292          |
| pcDNA5/FRT/TO                                       | Invitrogen                  | Cat. #V6520-20   |
| FRT/TO V5 DnaJB6                                    | (Hageman et al., 2010)      | N/A              |
| FRT/TO V5 DnaJB1                                    | (Hageman et al., 2010)      | N/A              |
| FRT/TO V5 DnaJB6 H31Q                               | (Hageman et al., 2010)      | N/A              |
| FRT/TO V5 DnaJB6 M3                                 | (Kakkar et al., 2016)       | N/A              |
| pCIneo-FlucDM                                       | (Gupta et al., 2011)        | N/A              |
| mCherry-N1                                          | Clontech                    | Cat. #632523     |
| pYES2-FlucDM-mCh                                    | This study                  | pCLK332          |

## Supplementary Table 5 | Primers used in this study.

| Primer name    | Sequence                                                                           |
|----------------|------------------------------------------------------------------------------------|
| 5 GST XbaI     | AAAActagaatgtcccataactagg                                                          |
| 3 GST GS3 BHI  | aaaaGGATCCggttctggttctggttcttttgaggatggtcgc                                        |
| 5 GFP BHI      | AAAAGgatccATGagtaaaggagaagaacttttc                                                 |
| 3 GFP NLS Sall | AAAAGtgcacttaAACCTTTCTCTTCTTCTTTGGttgtatagttcatccatg                               |
| 5 mCh BHI      | AAAAGgatccATGGTGAGCAAGGGCG                                                         |
| 3 mCh NLS Sall | AAAAGtgcacttaAACCTTTCTCTTCTTCTTTGGCTTGACAGCTCG<br>TCC                              |
| 5 Hsf1 EcoRI   | aaaaGAATTCATGAATAATGCTGCAAATAC                                                     |
| 3 Hsf1 XhoI    | aaaaCTCGAGCTATTTCTTAGCTCGTTTG                                                      |
| 5 LacZ BamHI   | aaaaGGATCCGGAGCTTGG                                                                |
| 3 LacZ Sall    | AAAAGtgcacttaTTTTTTGACACCAGACC                                                     |
| 5 pHSE BgIII   | AGCCagatctTTTAGGCTCGAAGATCC                                                        |
| 5 Ydj1 SpeI    | AAAaactagtATGGTTAAAGAACTAAGTTT                                                     |
| 3 Ydj1 BHI     | AAAAGgatccTCATTGAGATGCACATTG                                                       |
| 5 V5 SpeI      | AAAaactagtATGGGTAAGCCTATCCC                                                        |
| 3 Dnajb1 XhoI  | AAAActcgagctatattggaagaacctg                                                       |
| 3 Dnajb6b XhoI | AAAActcgagtactgttatccaagcg                                                         |
| PolyQBB_fw     | GGCCCAGCTGTGGCTGAGGAG                                                              |
| Int_PolyQrev   | GAAGCTTTTGAGGGACTCGAAG                                                             |
| 5 Sis1 BamHI   | aaaaGGATCCatggtcaaggagacaaaac                                                      |
| 3 Sis1 NotI    | aggcGCGGCCGCtaaaaatttcatctatagc                                                    |
| 5 SpeI HASis1  | aaaaACTAGTATGTCCTACCCAT                                                            |
| 3 Sis1 BHI     | aaaaGGATCCTTAAAAATTTTCATCTATAGC                                                    |
| 5 SpeI HAYdj1  | AAAaactagtATGTCCTACCCATACGATGTTCCAGATTACGCTGA<br>TATGGTTAAAGAACTAAGTT              |
| 3 Ydj1 BHI     | AAAAGgatccTCATTGAGATGCACATTG                                                       |
| 3 Sis1-121 BHI | aaaaGGATCCttaGCCGCCAAAGAATTGTG                                                     |
| 3 Sis1-338 BHI | AAAAGgatccctaTATTGGATAGTCCACTTTA                                                   |
| pRS_Ssa1_fw    | TAGAACTAGTGGATCCCCCGGGCTGCAGGAATGTCAAAGCT<br>GTCGGTATTG                            |
| Ssa1_GS_rev    | TTCTCCTTTACTGGAGCCACTACCGGAACCATCAACTTCTTCA<br>ACGGTTGG                            |
| GS_GFP_fw      | GGTTCGGTAGTGGCTCCAGTAAAGGAGAAGAAGCTTTTCACTG                                        |
| GFP_pRS_rev    | TCGACGGTATCGATAAGCTTGATATCGAATCTATTTGTATAGTT<br>CATCCATGCCATG                      |
| pRS_MCS_fw     | ATTCGATATCAAGCTTATCGATACCGTC                                                       |
| pRS_MCS_rev    | TCCTGCAGCCCGGGGG                                                                   |
| 5 Sis1-GFP     | ACTAAACGACGCTCAAAAACGTGCTATAGATGAAAATTT<br>TGGTTCTGGTTCTGGTTCTCGGATCCCCGGGTTAATTAA |
| 3 Sis1-GFP     | ATTTATTTGAGTTTATAATTATATTTGCTTAGGATTACTAG<br>AATTCGAGCTCGTTTAAAC                   |

**Supplementary Table 6 | Experimental models: cell lines and yeast strains used in this study.**

| <b>Model</b>         | <b>Name</b>                                                                                    | <b>Source</b>                | <b>Identifier</b> |
|----------------------|------------------------------------------------------------------------------------------------|------------------------------|-------------------|
| <i>S. cerevisiae</i> | YPH499: <i>MATa ura3-52 lys2-801_amber ade2-101_ochre trp1-Δ63 his3-Δ200 leu2-Δ1</i>           | (Sikorski and Hieter, 1989)  | N/A               |
| <i>S. cerevisiae</i> | YPH499 <i>ura3-52::URA::P<sub>GPD</sub>-GST-GFP-NLS</i>                                        | This study                   | yCLK225           |
| <i>S. cerevisiae</i> | YPH499 <i>leu2-Δ1::LEU::P<sub>ADH</sub>-SSA1-GFP</i>                                           | This study                   | yCLK250           |
| <i>S. cerevisiae</i> | YPH499 <i>Δssa1::KANMX4</i>                                                                    | This study                   | yCLK243           |
| <i>S. cerevisiae</i> | YPH499 <i>SIS1GFP::KANMX6</i>                                                                  | This study                   | yCLK207           |
| <i>S. cerevisiae</i> | YPH499 <i>leu2-Δ1::LEU::P<sub>ADH</sub>-SSA1-GFP ura3-52::URA::P<sub>GPD</sub>-GST-mCh-NLS</i> | This study                   | yCLK255           |
| <i>S. cerevisiae</i> | YPH499 <i>SIS1GFP::KANMX6 ura3-52::URA::P<sub>GPD</sub>-GST-mCh-NLS</i>                        | This study                   | yCLK256           |
| Human cell line      | HEK293T                                                                                        | ATCC                         | ATCC CRL-3216     |
| Human cell line      | HEK293T DNAJB6 <sup>-/-</sup>                                                                  | (Thiruvalluvan et al., 2020) | N/A               |

## Supplementary Table 7 | Antibodies used in this study.

| Antibody                                    | Dilution | Source                                            | Catalog No. | RRID        |
|---------------------------------------------|----------|---------------------------------------------------|-------------|-------------|
| mCherry monoclonal antibody (rat)           | 1:1,000  | Invitrogen                                        | M11217      | AB_2536611  |
| Anti-Hsp104 polyclonal antibody (rabbit)    | 1:1,000  | Abcam                                             | ab2924      | AB_2041710  |
| Hsp26 Antibody (rabbit)                     | 1:5,000  | Johannes Buchner (Technische Universität München) | N/A         | N/A         |
| PGK1 monoclonal antibody (mouse)            | 1:1,000  | Invitrogen                                        | 459250      | AB_2532235  |
| Sis1 Antibody (rabbit)                      | 1:10,000 | Cosmo Bio                                         | COP-080051  | AB_10709957 |
| Ydj1 Antibody (rabbit)                      | 1:10,000 | Elizabeth Craig (University of Wisconsin-Madison) | N/A         | N/A         |
| Anti-HA High Affinity (rat)                 | 1:1,000  | Roche                                             | 11867423001 | AB_390918   |
| Anti-v5 tag monoclonal antibody (mouse)     | 1:1,000  | Abcam                                             | ab27671     | AB_471093   |
| Ssa1/2 Antibody (rabbit)                    | 1:10,000 | Elizabeth Craig (University of Wisconsin-Madison) | N/A         | N/A         |
| HSP70/HSP72 monoclonal antibody (mouse)     | 1:1,000  | Enzo Life Sciences                                | ADI-SPA-810 | AB_10616513 |
| HSP70B monoclonal antibody (mouse)          | 1:2,000  | Enzo Life Sciences                                | ADI-SPA-754 | AB_10615942 |
| HSP27 polyclonal antibody (rabbit)          | 1:1,000  | Enzo Life Sciences                                | ADI-SPA-803 | AB_10615084 |
| GAPDH monoclonal antibody (mouse)           | 1:10,000 | Fitzgerald                                        | 10R-G109A   | AB_1285808  |
| Andi-DnaJB6 (rabbit)                        | 1:2,000  | Ineke Braakman (Utrecht University)               | N/A         | N/A         |
| Recombinant Anti-Hsf1 antibody (rabbit)     | 1:30,000 | Abcam                                             | ab52757     | AB_880518   |
| Anti-HSF1 (phosphor S326) antibody (rabbit) | 1:5,000  | Abcam                                             | ab76076     | AB_1310328  |
| V5 Tag monoclonal antibody (mouse)          | 1:5,000  | Invitrogen                                        | 46-0705     | AB_2556564  |
